# Supplementary material for: Enhanced photocurrent density of hematite thin films on FTO substrates: effect of post-annealing temperature
Source: Royal Society of Chemistry journal article supplement (doi:10.1039/c5cp01823d), 2015-01-01
Supplement: c5cp01823d1.pdf [file c5cp01823d1.pdf]

## Supporting information

# Enhanced Photocurrent Density of Hematite Thin Films on FTO Substrates: Effect of Post- Annealing Temperature

*Eun Soo Cho, Myung Jong Kang and Young Soo Kang\**

Korea Center for Artificial Photosynthesis and Department of Chemistry, Sogang University,  
Seoul 121-742, Korea

\*Corresponding Author E-mail: [yskang@sogang.ac.kr](mailto:yskang@sogang.ac.kr)

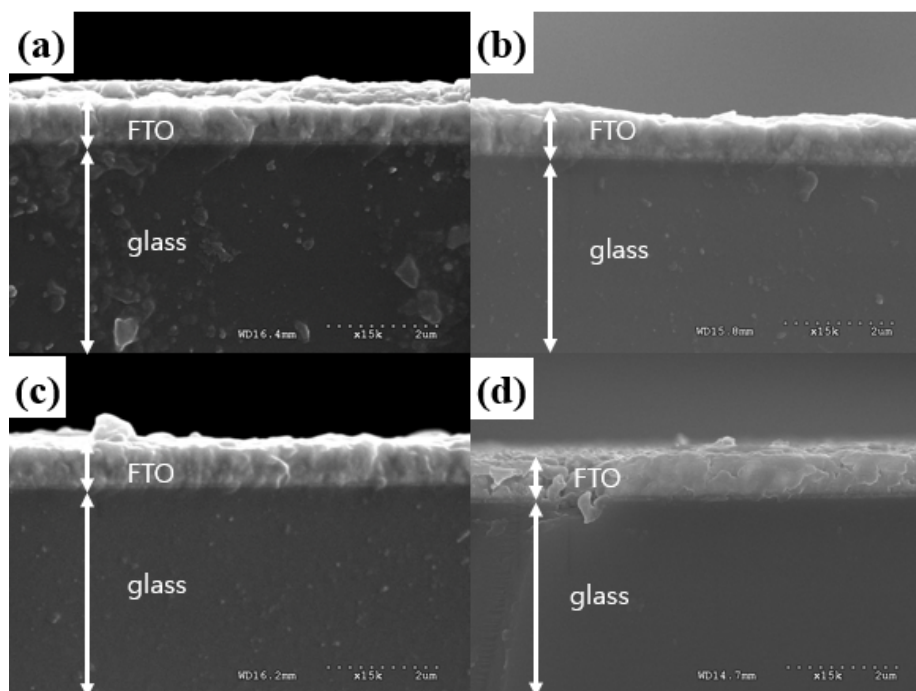

**Figure S1.** Cross-sectional SEM images of 10DA hematite films (a) H550 (b) H600 (c) H700 and (d) H800 (all scale bars are 2 $\mu\text{m}$ ).

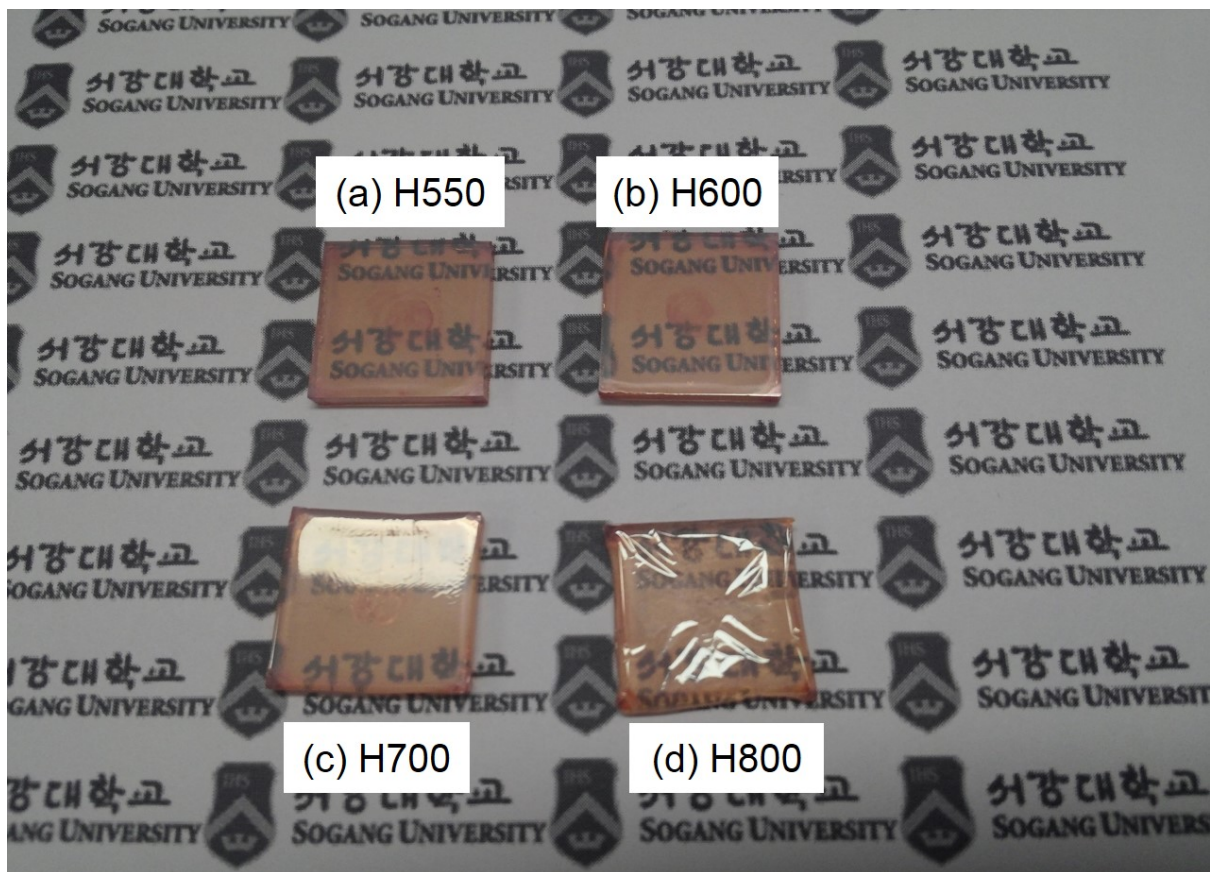

**Figure S2.** Digital pictures of H550, H600, H700 and H800 hematite thin films prepared by deposition and annealing (DA) method of 10 DA cycles.

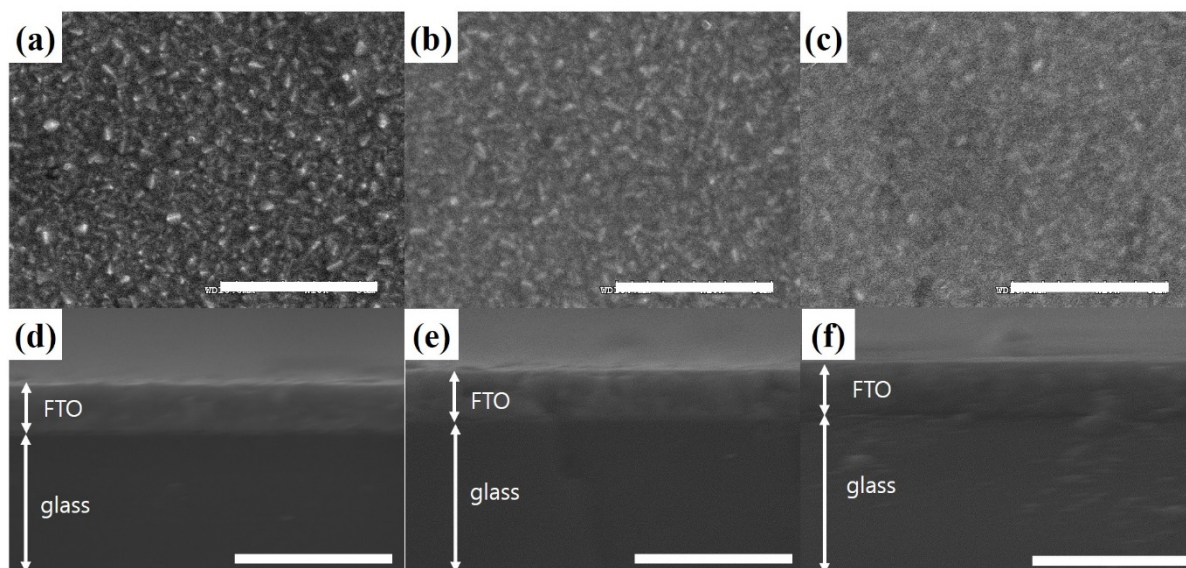

**Figure S3.** Top-view SEM images of H550 samples with (a) 20 DA (b) 30 DA and (c) 40 DA cycles (all scale bars are 5 $\mu$ m). Cross-sectional SEM images of H550 samples with (d) 20 DA (e) 30 DA and (f) 40 DA cycles (all scale bars are 2 $\mu$ m).

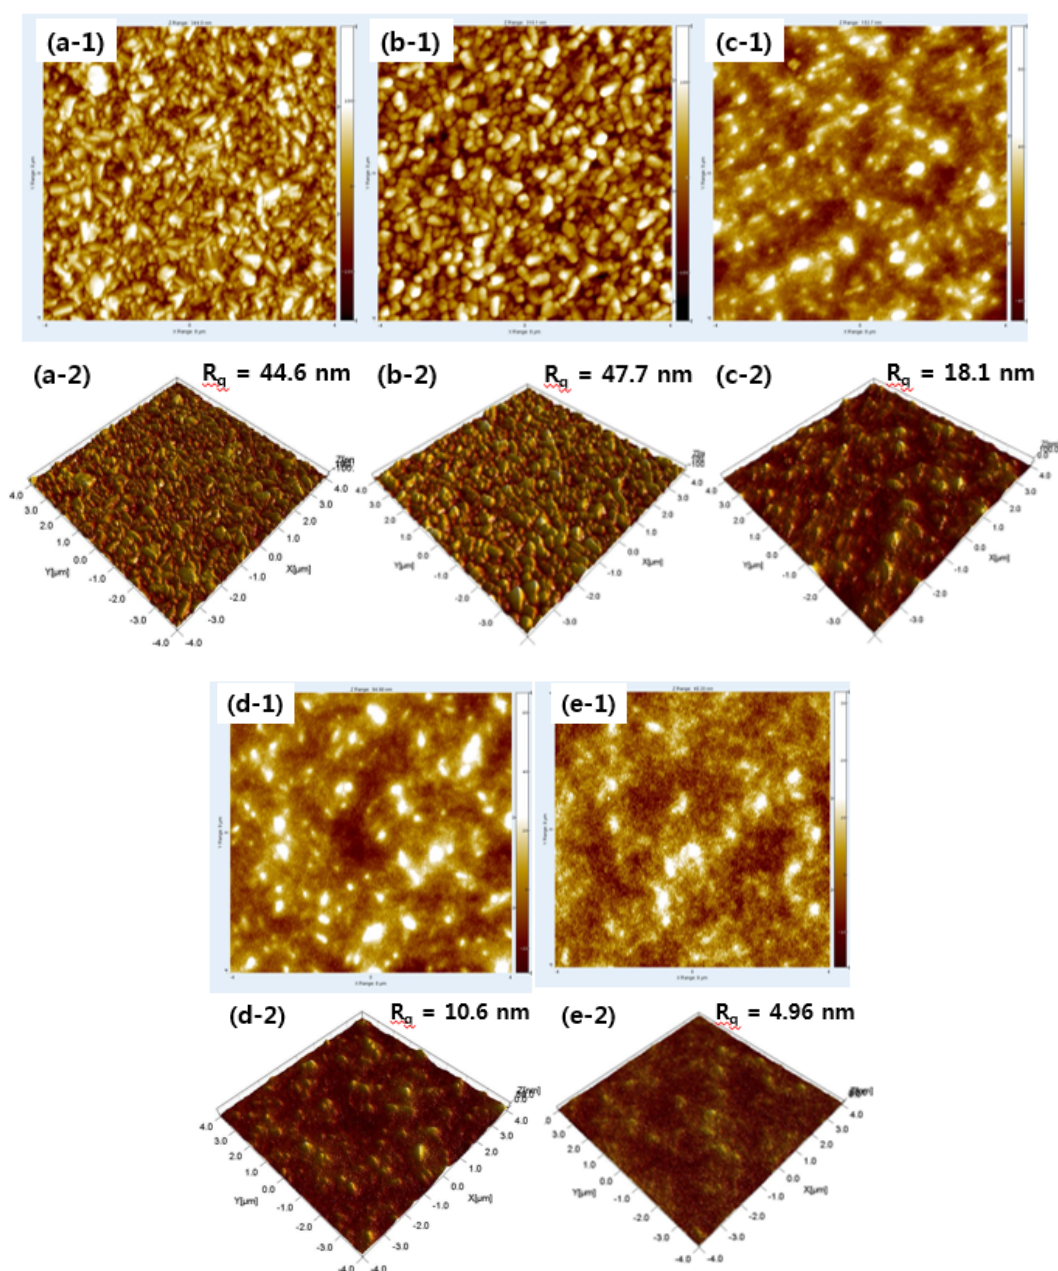

**Figure S4.** 2D and 3D atomic force microscopy scan images of bare FTO (a-1) and (a-2), H550 with 10 DA (b-1) and (b-2), H550 with 20 DA (c-1) and (c-2), H550 with 30 DA (d-1) and (d-2), H550 with 40 DA (e-1) and (e-2). (8x8  $\mu\text{m}$  image scale,  $R_q$  is root mean square roughness of surface).

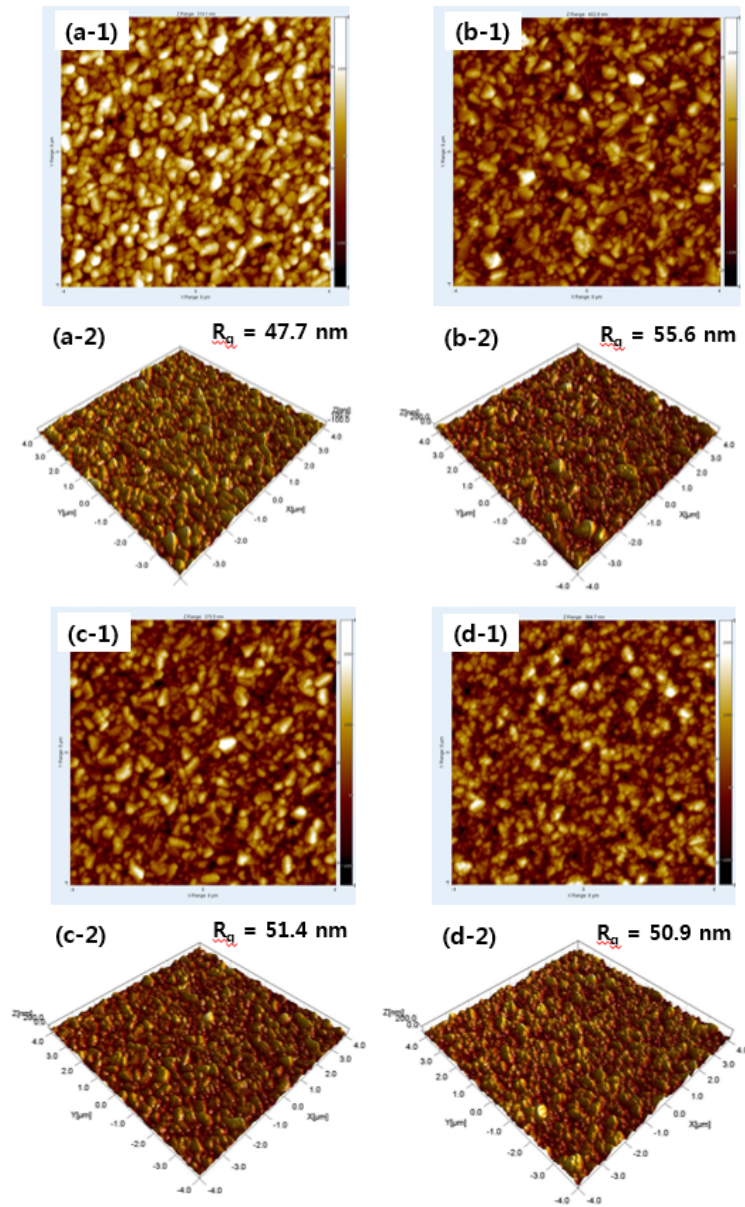

**Figure S5.** 2D and 3D atomic force microscopy scan images of 10DA hematite films H550 (a-1) and (a-2), H600 (b-1) and (b-2), H700 (c-1) and (c-2), H800 (e-1) and (e-2). (8x8  $\mu\text{m}$  image scale,  $R_q$  is root mean square roughness of surface)

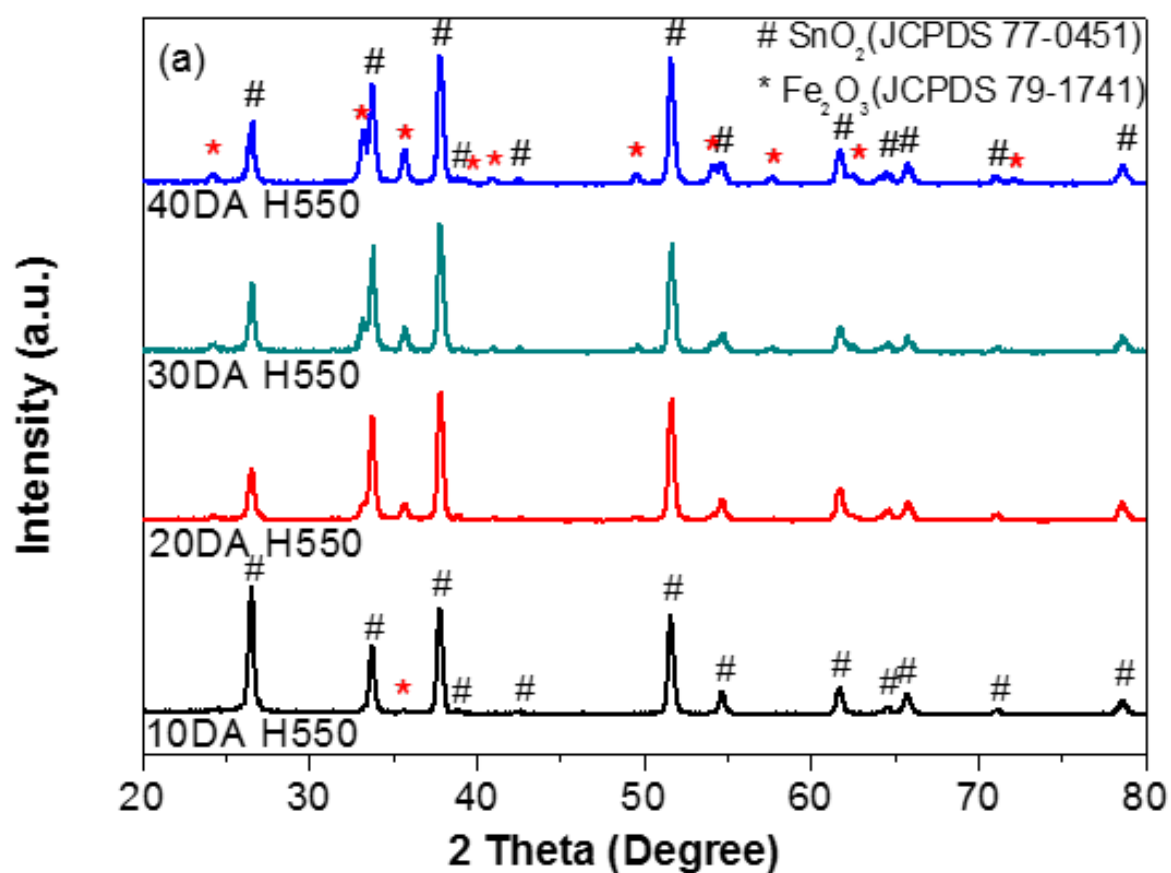

**Figure S6.** X-ray diffraction (XRD) patterns of H550 samples prepared with 10 DA, 20 DA, 30 DA, and 40 DA cycles ( $\text{SnO}_2$  for JCPDS No. 77-0451 and  $\alpha\text{-Fe}_2\text{O}_3$  for JCPDS No. 79-1741).

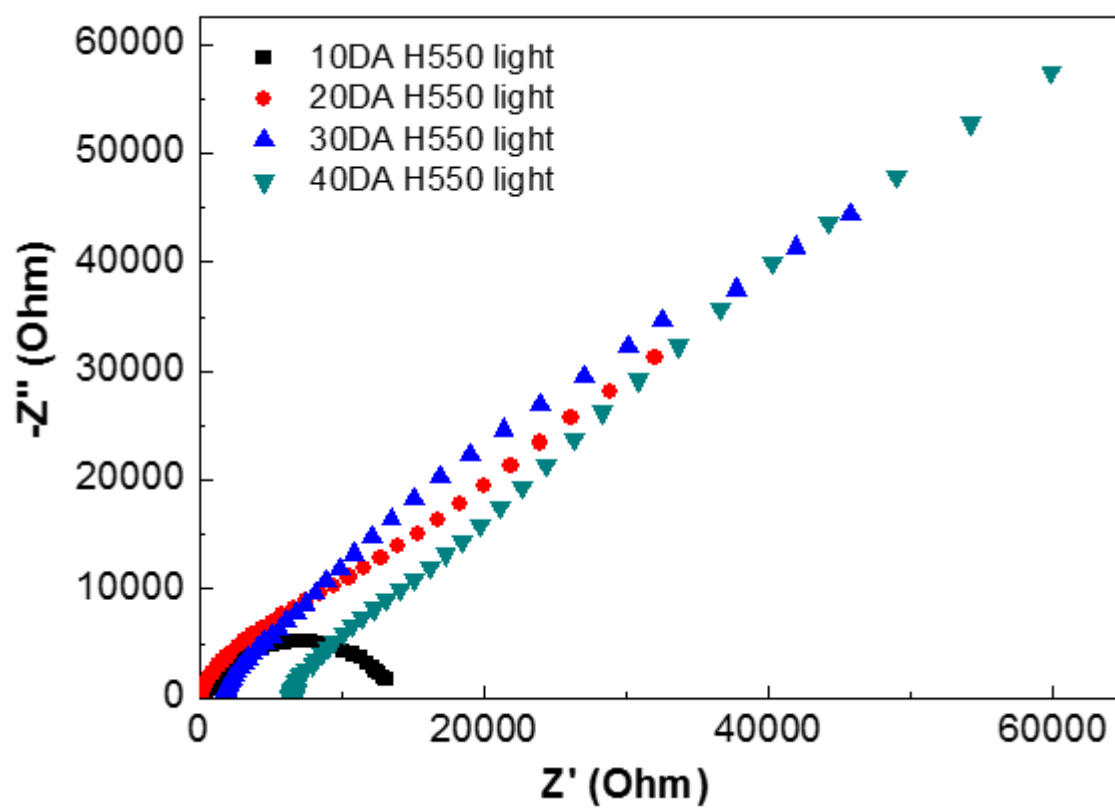

**Figure S7.** Nyquist plots of H550 films with 10 DA, 20 DA, 30 DA, and 40 DA, with 1 sun illumination condition.

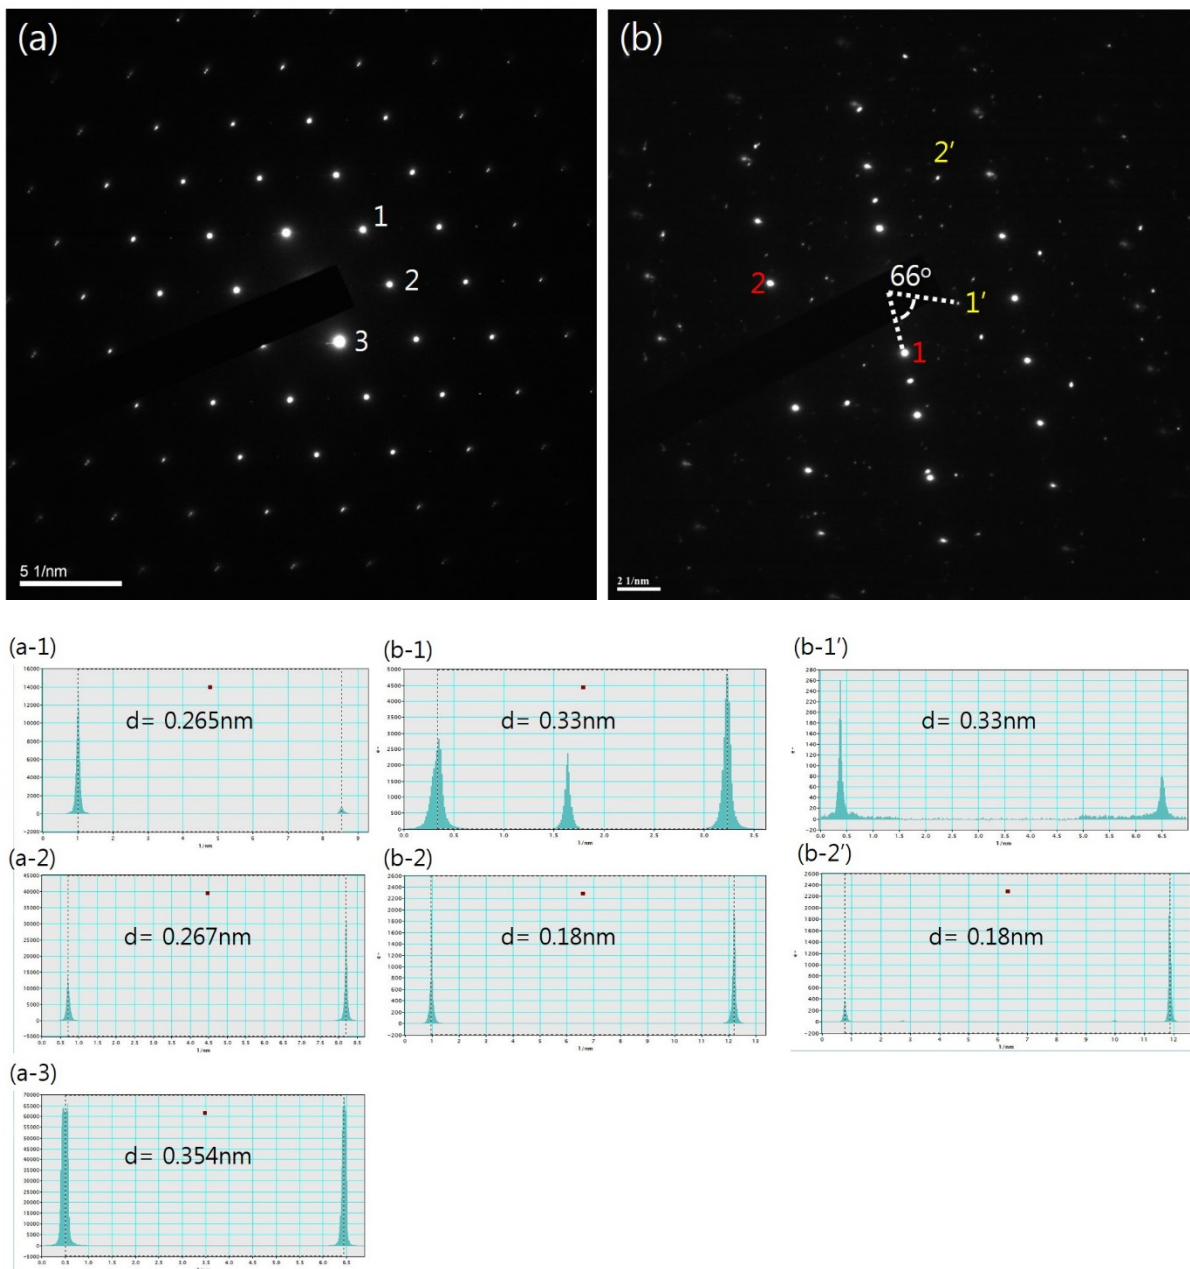

**Figure S8.** TEM SAED patterns of FTO substrate ( $\text{SnO}_2$ ) for (a) H700 and (b) H800 with 10 DA cycles. Spectrum line profile for spot 1 in H700 (a-1), spot 2 in H700 (a-2), spot 3 in H700 (a-3), spot 1 in H800 (b-1), spot 2 in H800 (b-2), tilted spot 1' in H800 (b-1') and spot 2' in H800 (b-2').

D-spacing values have been calculated by spectrum line profiling. Distance between pattern and pattern has been measured in spectrum line profiling, take the inversed value to get d-spacing value as marked on each spectrum line profiling.

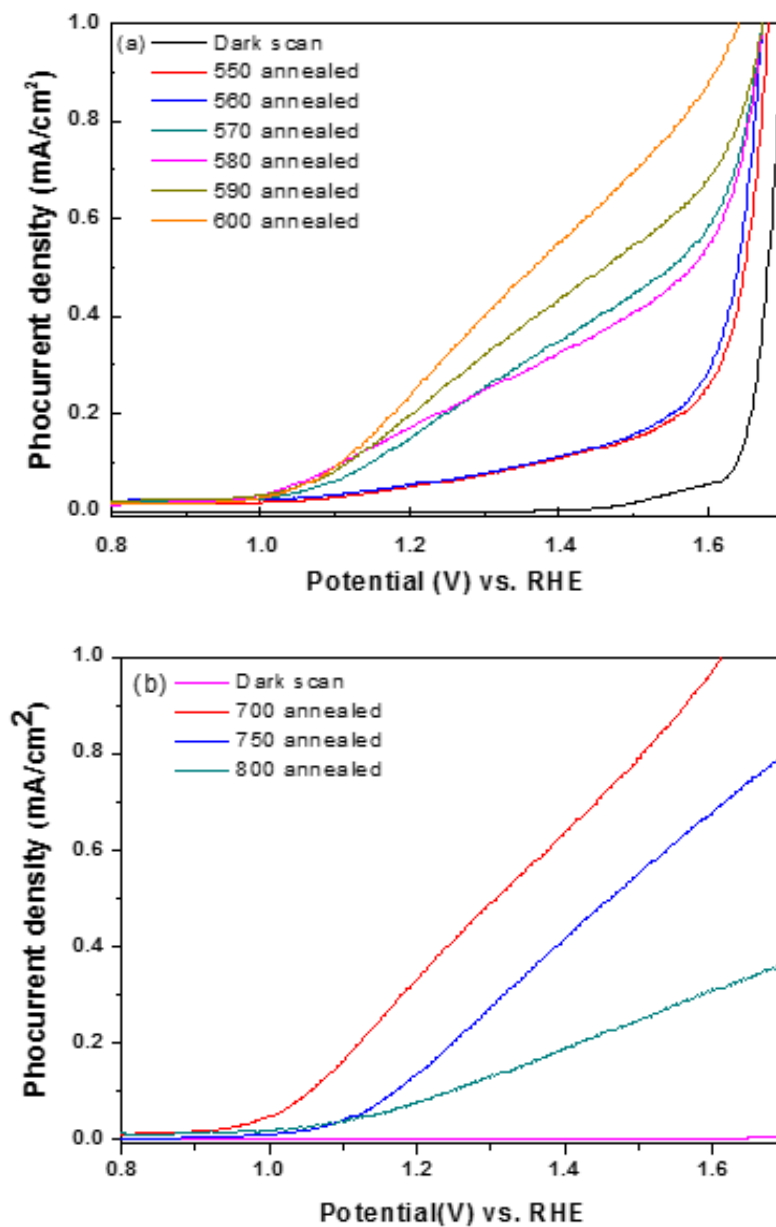

**Figure S9.** Photocurrent density curves of hematite thin films with 10 DA cycles at different annealing temperature. (a) 550 °C, 560 °C, 570 °C, 580 °C, 590 °C, 600 °C (b) 700 °C, 750 °C, 800 °C.

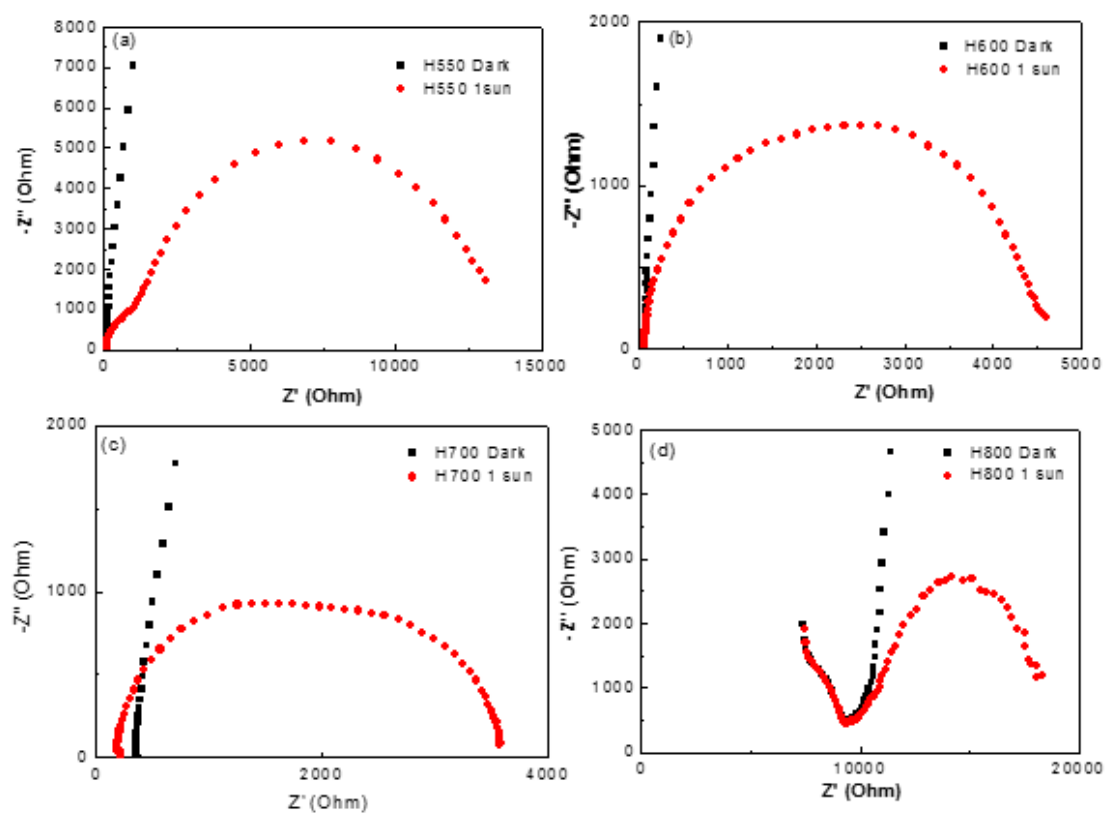

**Figure S10.** Nyquist plots of (a) H550, (b) H600, (c) H700, (d) H800 with 10 DA in dark condition and 1 sun illumination condition.

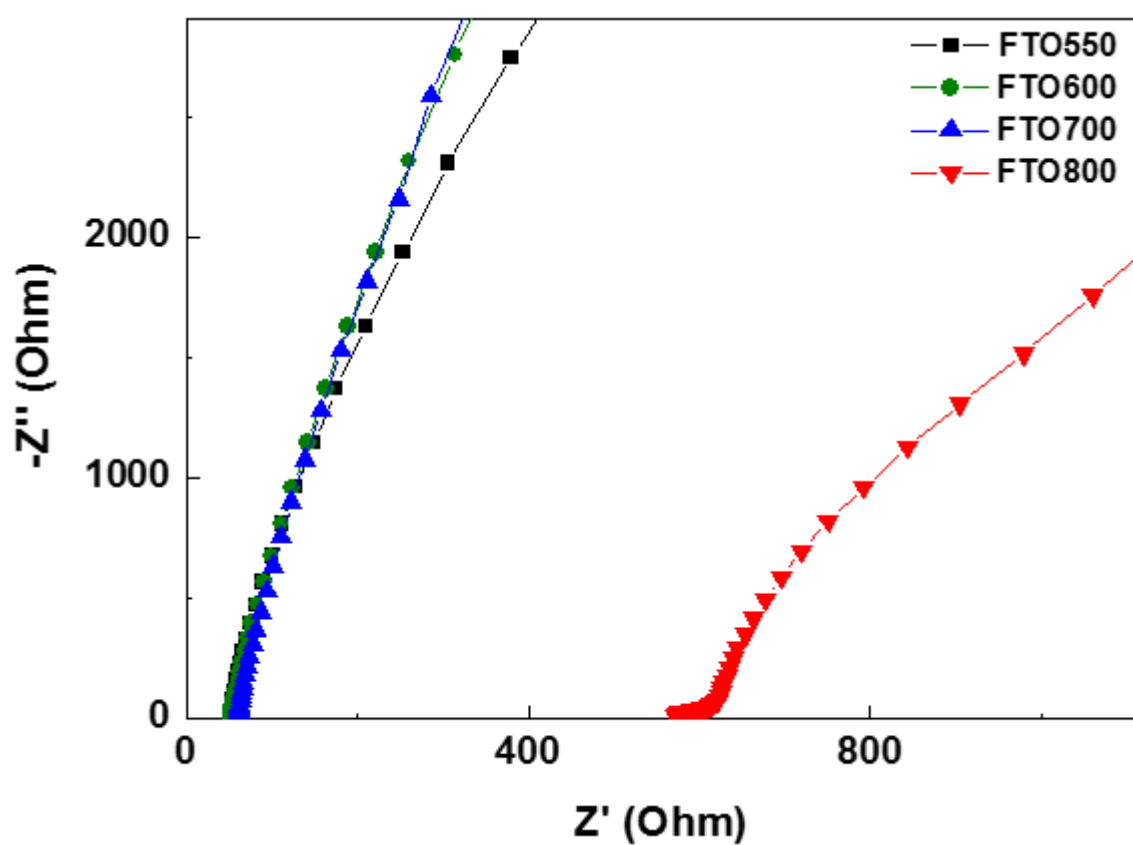

**Figure S11.** Nyquist plots of (a) FTO550, (b) FTO 600, (c) FTO 700, (d) FTO 800.

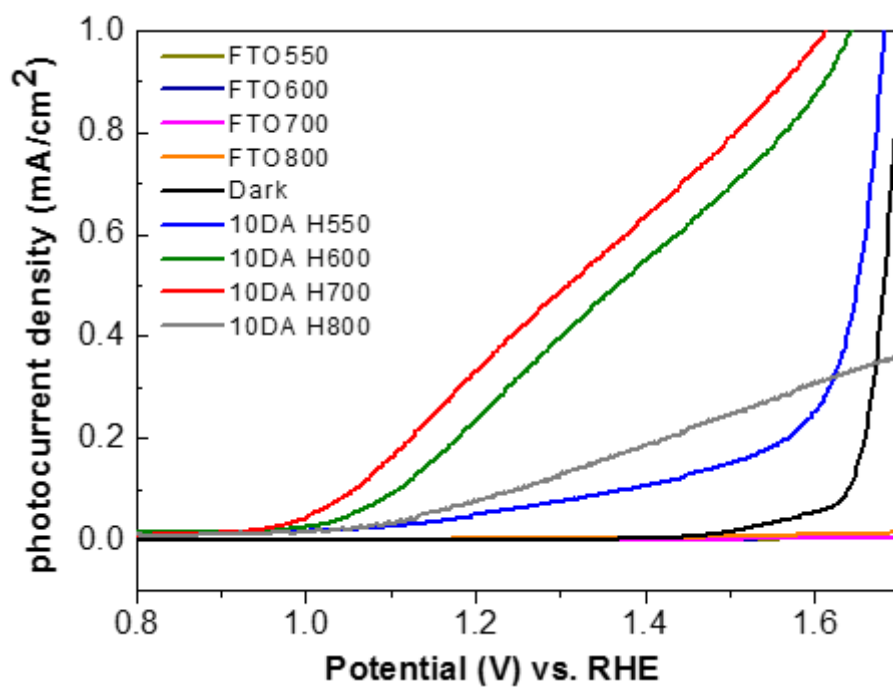

**Figure S12.** Photocurrent density curves of FTO550, FTO600, FTO700, FTO800, dark scan, H550, H600, H700, and H800 samples with 10 DA.

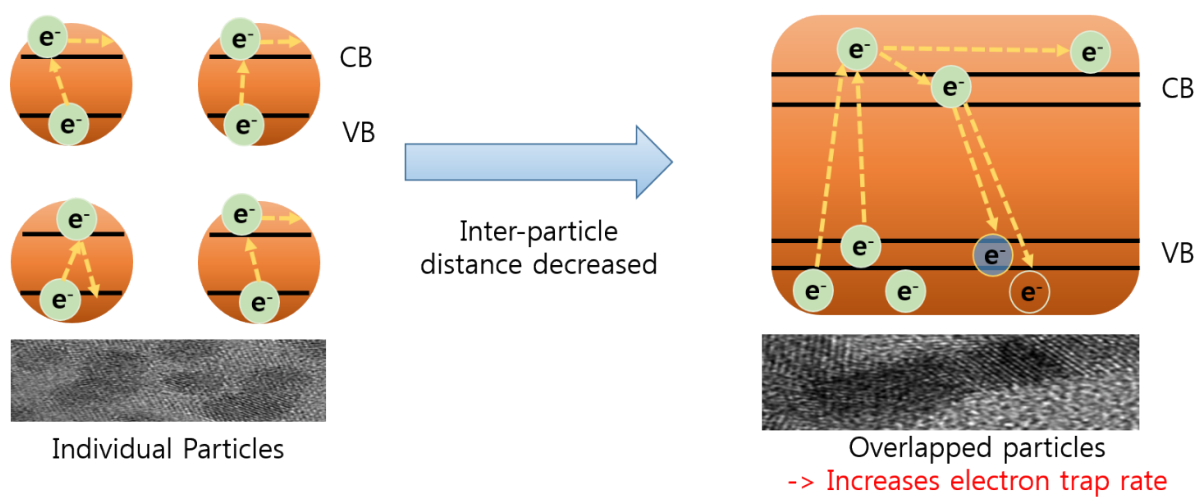

**Figure S13.** Schematic drawings on wave function overlap and electron-hole recombination rate along the inter-particle distance.

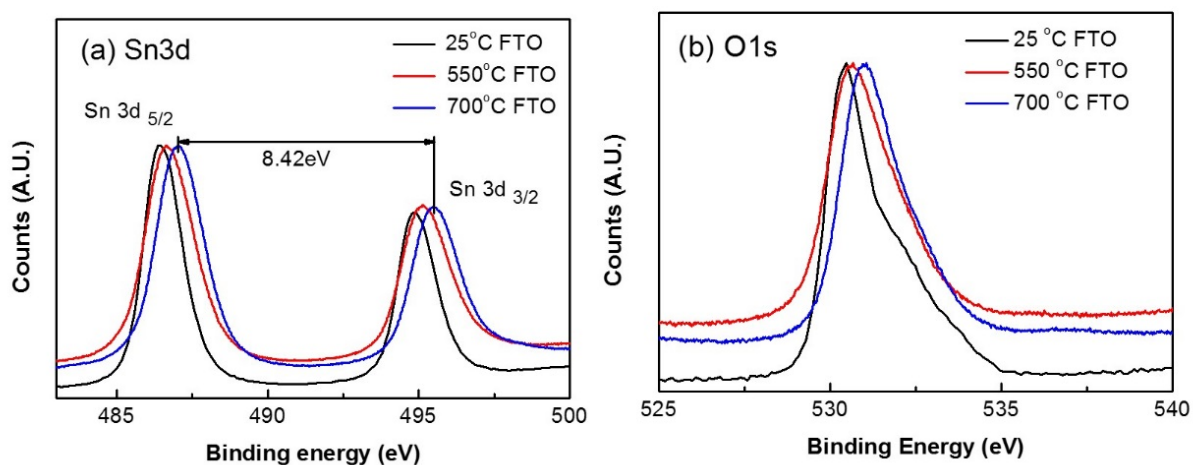

**Figure S14.** XPS spectra of (a) Sn3d configuration and (b) O1s configuration for 25 °C FTO substrate, FTO substrate annealed at 550 °C and FTO substrate annealed at 700 °C.

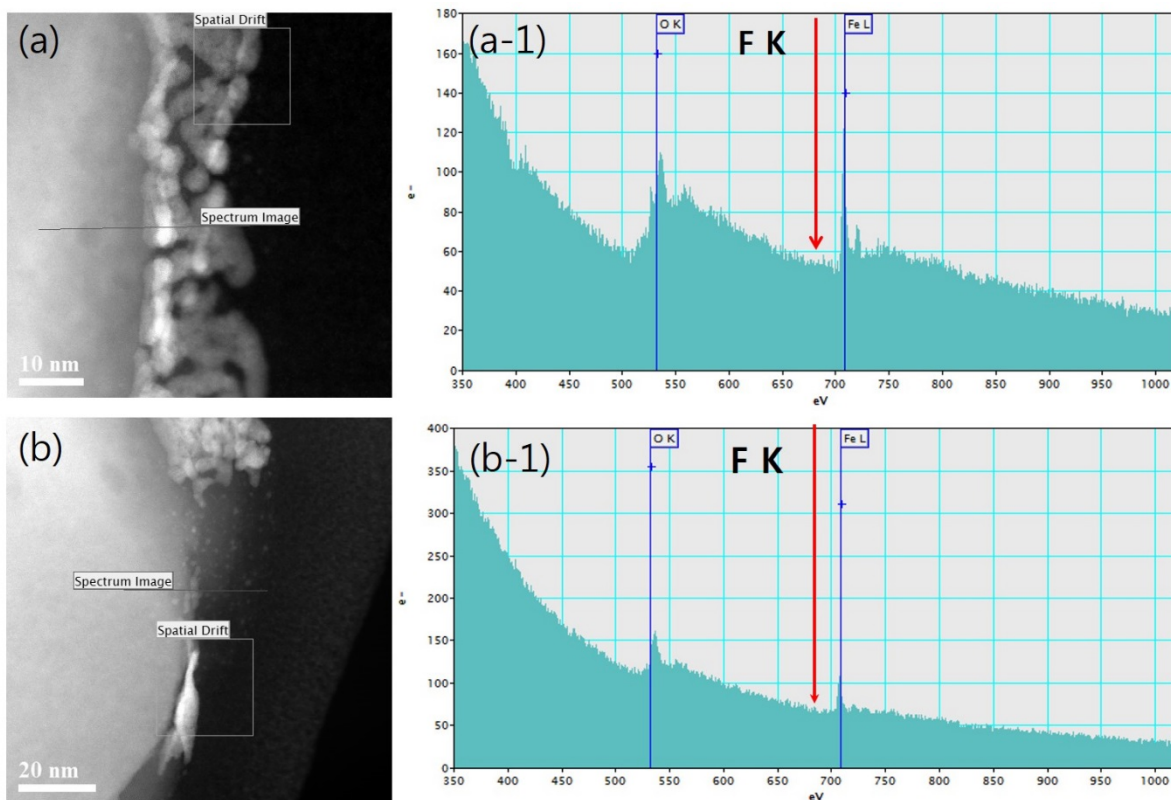

**Figure S15.** Electron energy loss spectroscopy (EELS) analysis for H700 sample of 10 DA cycles. (a) Image for spectrum, (a-1) spectrum of designated area in (a), (b) image for spectrum, (b-1) spectrum of designated area in (b). Red line is Fluorine K edge peak position.

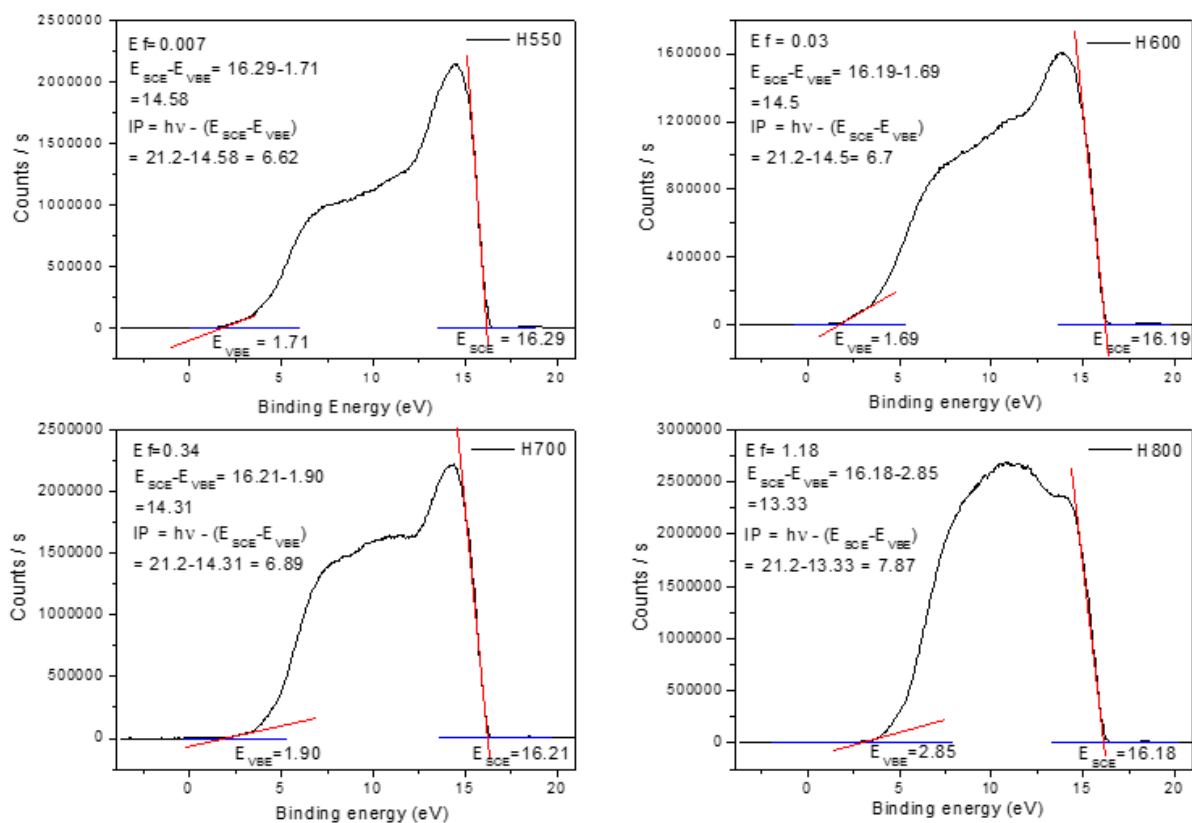

**Figure S16.** UPS valence band position assignment of (a) H550, (b) H600, (c) H700 and (d) H800 with 10 DA cycles.
